# Supplementary material for: <strong>COVID 19 Related Social Distancing Effects on Carbon Monoxide Levels in a Populated </strong><strong>Southeast Asia City</strong>
Source: Preprints.org preprint supplement (doi:10.20944/preprints202004.0483.v1), 2020-04-28
Supplement: Supplementary file 1 [file supplementary]

## Sheet: Sheet1
	January	February	March	April
Mean	87.46	88.2	86.38	78.68
Stdev	6.31505	10.5646	8.57448	7.49723
95%CI	83.546 and 91.374	81.652 and 94.748	81.0656 and 91.6944
